# Supplementary material for: A dual-channel “on–off–on” fluorescent probe for the detection and discrimination of Fe3+ and Hg2+ in piggery feed and swine wastewater
Source: Royal Society of Chemistry journal article supplement (doi:10.1039/d2ay00629d), 2022-01-01
Supplement: d2ay00629d1.pdf [file d2ay00629d1.pdf]

## Supporting Information

### **A dual-channel “on-off-on” fluorescent probe for the detection and discrimination of Fe<sup>3+</sup> and Hg<sup>2+</sup> in piggery feed and swine wastewater**

Qing Fan<sup>a, b, 1</sup>, Guang-Ming Bao<sup>a, c, 1</sup>, Si-Han Li<sup>a</sup>, Si-Yi Liu<sup>a</sup>, Xin-Ru Cai<sup>a</sup>, Yi-Fan Xia<sup>b</sup>, Wei Li<sup>b</sup>,  
Xiao-Ying Wang<sup>a</sup>, Ke Deng<sup>a</sup>, Hou-Qun Yuan<sup>b, c, \*</sup>

*<sup>a</sup> Institute of Veterinary Drug/Biotechnological Engineering Center for Pharmaceutical Research and Development, Jiangxi Agricultural University, Nanchang 330045, PR China.*

*<sup>b</sup> College of Chemistry and Materials, Jiangxi Agricultural University, Nanchang 330045, P.R. China.*

*<sup>c</sup> School of Biological Engineering and Food, Hubei University of Technology, Wuhan 430068, P.R. China.*

<sup>1</sup> These authors contributed equally to this work.

\*Corresponding authors. (E-mail: [hqyuan2014@126.com](mailto:hqyuan2014@126.com))

**Table S1**

Comparison of reported sensing systems for fluorescent CDs with current work.

| Type of Probes             | Carbon sources        | Ion detected                       | Linear range( $\mu\text{M}$ ) | LOD ( $\mu\text{M}$ ) | QY(%)   | Ref.         |
|----------------------------|-----------------------|------------------------------------|-------------------------------|-----------------------|---------|--------------|
| Feathers-CDs <sup>1</sup>  | Pigeon feathers       | Fe <sup>3+</sup> &Hg <sup>2+</sup> | 0-1.6 & 0-1.2                 | 0.0609 &<br>0.0103    | 24.87   | 36           |
| Soot-CDs <sup>2</sup>      | Candle soot           | Fe <sup>3+</sup> &Hg <sup>2+</sup> | 20–50                         | 0.01&0.05             | -       | 38           |
| Leaves-CDs <sup>3</sup>    | Bamboo leaves         | Hg <sup>2+</sup> &Pb <sup>2+</sup> | 0.001-1&0.0006-0.8            | 0.00022 &<br>0.00014  | 3.8&4.7 | 41           |
| Soot-CDs <sup>4</sup>      | Diesel soot           | Fe <sup>3+</sup> &Hg <sup>2+</sup> | 0-12                          | 0.325&<br>0.898       | 8       | 58           |
| Bluegrass-CDs <sup>5</sup> | Kentucky<br>bluegrass | Fe <sup>3+</sup> &Mn <sup>2+</sup> | 5–25                          | 1.4 & 1.2             | 7       | 59           |
| Bergamot-CDs <sup>6</sup>  | Jinhua bergamot       | Fe <sup>3+</sup> &Hg <sup>2+</sup> | 0.025-100&0.01-100            | 0.075&<br>0.0055      | 50.78   | 63           |
| Blood-CDs <sup>7</sup>     | Chicken blood         | Fe <sup>3+</sup> &Hg <sup>2+</sup> | 0-120&0-100                   | 0.23&0.17             | 13.78   | This<br>work |

<sup>1</sup> Synthesis with Pigeon feathers as carbon source.<sup>2</sup> Synthesis with Candle soot as carbon source.<sup>3</sup> Synthesis with Bamboo leaves as carbon source.<sup>4</sup> Synthesis with Diesel soot as carbon source.<sup>5</sup> Synthesis with Kentucky bluegrass as carbon source.<sup>6</sup> Synthesis with Jinhua bergamot as carbon source.<sup>7</sup> Synthesis with Chicken blood as carbon source.

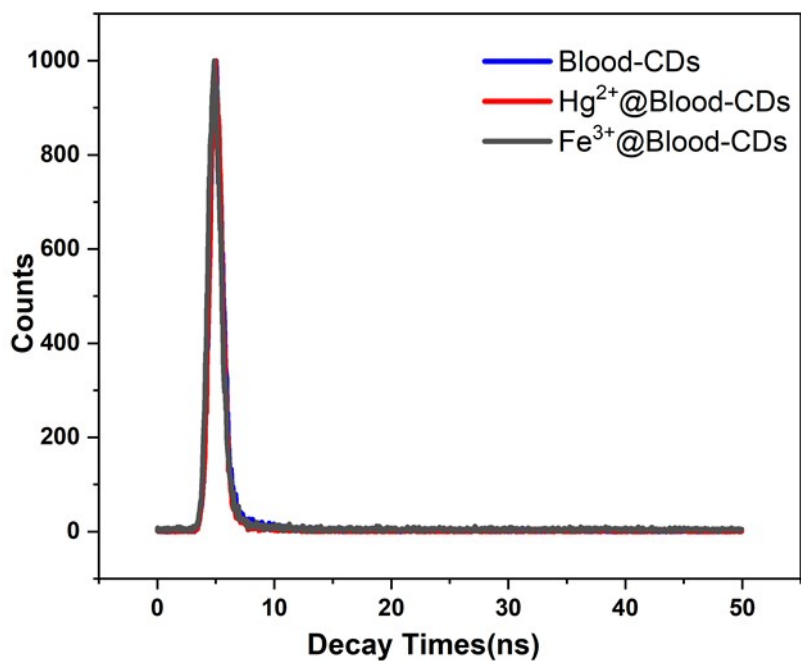

**Fig. S1.** PL decay curves of Blood-CDs, Hg<sup>2+</sup>@Blood-CDs, and Fe<sup>3+</sup>@Blood-CDs.

**Table. S2.** The lifetime values of Blood-CDs, Hg<sup>2+</sup>@Blood-CDs, and Fe<sup>3+</sup>@Blood-CDs.

| Sample                      | $\tau_1/\text{ns}$ | $A_1/\%$ | $\tau_2/\text{ns}$ | $A_2/\%$ | $\tau_{\text{average}}/\text{ns}$ |
|-----------------------------|--------------------|----------|--------------------|----------|-----------------------------------|
| Blood-CDs                   | 0.544              | 93.48    | 3.118              | 6.52     | 0.712                             |
| Hg <sup>2+</sup> @Blood-CDs | 0.493              | 92.77    | 3.004              | 7.23     | 0.674                             |
| Fe <sup>3+</sup> @Blood-CDs | 0.511              | 93.04    | 3.013              | 6.96     | 0.685                             |

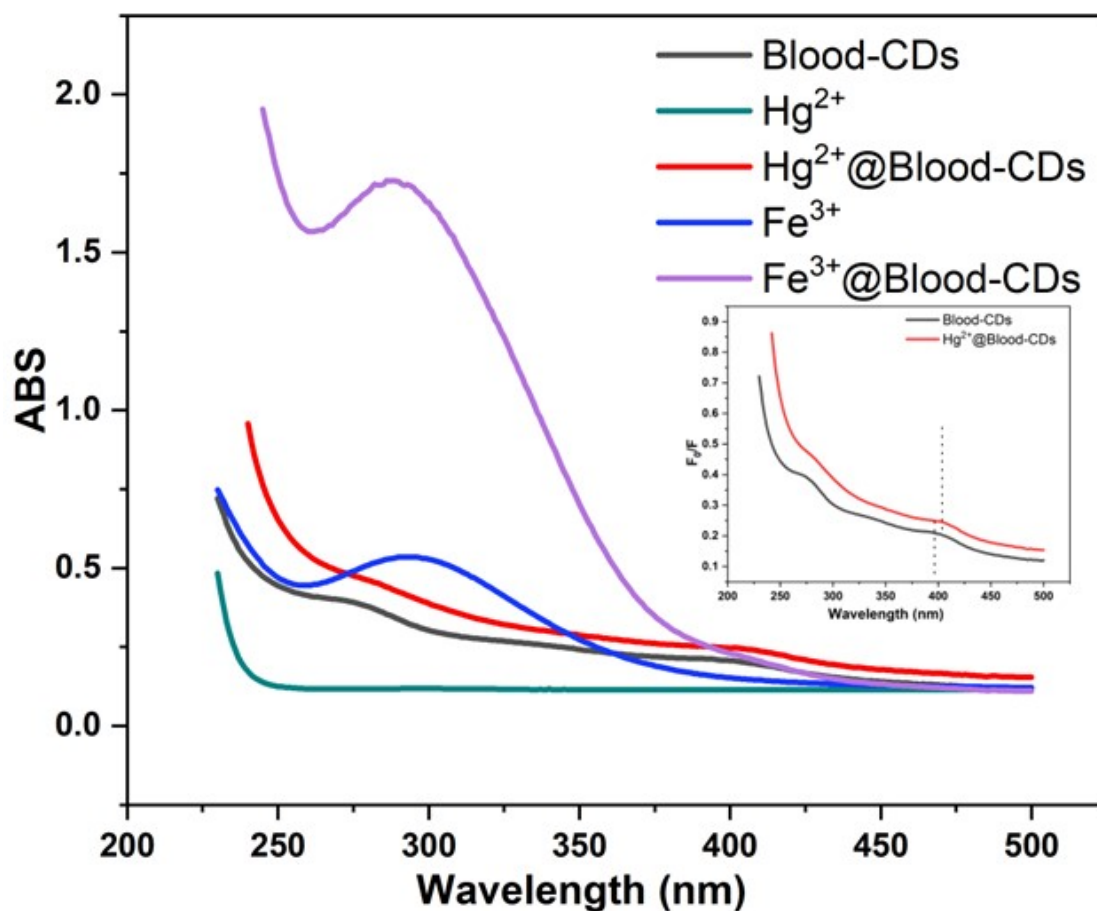

**Fig. S2.** UV-vis absorption spectra of Blood-CDs,  $\text{Hg}^{2+}$ ,  $\text{Hg}^{2+}$ @Blood-CDs,  $\text{Fe}^{3+}$ , and  $\text{Fe}^{3+}$ @Blood-CDs. The concentration of all the ions were 500  $\mu\text{M}$ .

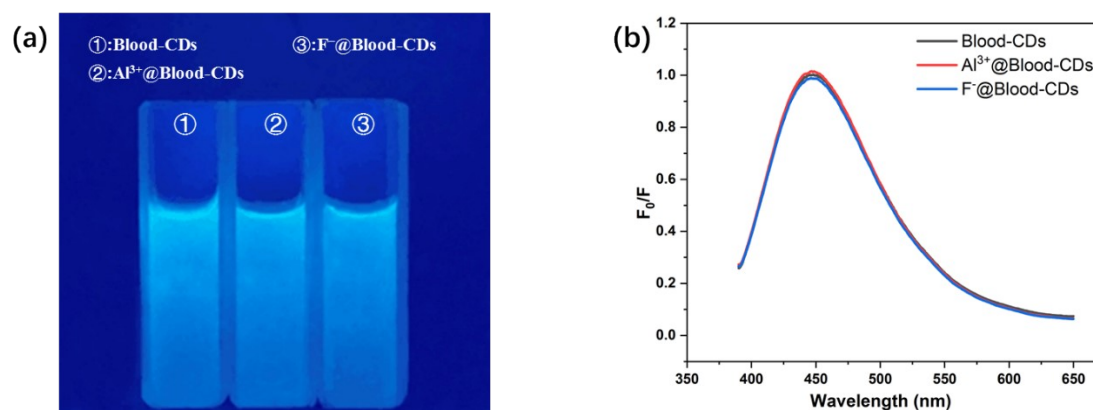

**Fig. S3.** (a) Fluorescence of Blood-CDs,  $\text{Al}^{3+}$ @Blood-CDs, and  $\text{F}^-$ @Blood-CDs under UV lamp (365 nm); (b) Fluorescence spectra of Blood-CDs,  $\text{Al}^{3+}$ @Blood-CDs, and  $\text{F}^-$ @Blood-CDs under excitation at 370 nm.

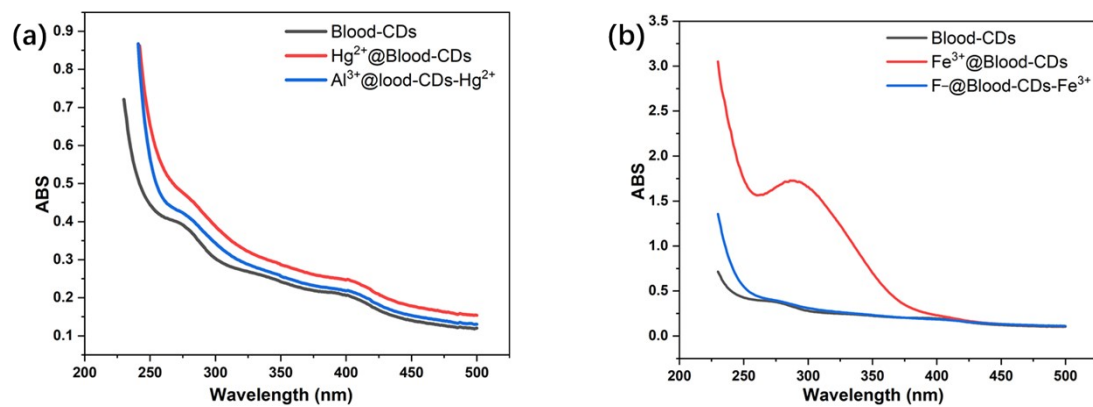

**Fig. S4.** (a) UV-vis absorption spectra of Blood-CDs, Hg<sup>2+</sup>@Blood-CDs, and Al<sup>3+</sup>@Blood-CDs-Hg<sup>2+</sup>; (b) UV-vis absorption spectra of Blood-CDs, Fe<sup>3+</sup>@Blood-CDs, and F<sup>-</sup>@Blood-CDs-Fe<sup>3+</sup>.
